# Supplementary material for: Suppression of Schistosoma japonicum Acetylcholinesterase Affects Parasite Growth and Development
Source: Int J Mol Sci. 2018 Aug 16;19(8):2426. doi: 10.3390/ijms19082426 (PMC6121427; doi:10.3390/ijms19082426)
Supplement: Supplementary file 1 [file ijms-19-02426-s001.xls]

## Sheet: primers
	Supplementary S1 Table. Details of the primers used in the real time PCR	Supplementary S1 Table. Details of the primers used in the real time PCR
	ID	Gene	Sequence(5'- 3')	Ta (℃)	Size of PCR product (bp)
	AChE	Acetylcholinesterase	F: CGTTCAGCTCCTGGAAATCTACTAGTT		126
			R: CACGCCTAAACAATGCTGACG
	AChR 1α	Nicotinic acetylcholine receptor 1α	F: GTTGGTCCAGTTGATCTGTCAGA		148
			R: GTGCACGTCGTTGTAGTTTTATAG
	AChR 1β	Nicotinic acetylcholine receptor 1β	F:GGAACGTCCTGTTTCAGTAGATG		207
			R:TTCCACATTCTTTCTGGTGGTAA
	AChR 2β	Nicotinic acetylcholine receptor 2β	F: GGCCGTCTAGTGGTGGATAA		140
			R: TCATATGCCATCGAACCAAA
	SGT1	Glucose transporter protein 1	F: GCAGGTGCAATAGGAGCATT		167
			R: CCAATAATAAAGCGGCCAAT
	SGT4	Glucose transporter protein 4	F: TAAGCTCTTTACTCAGAAAGATTTACGTATGC		160
			R: AACAACACAAAACTGTATGTAGTCAAGTGGGAT
	GYS	Glycogen synthase	F: TGTTCGAGGTTGTCATCTGG		149
			R: GGATCCTCGACATGCTCTTC
	PSMD4	26S proteasome non-ATPase regulatory subunit 4	F: CGTTCAGCTCCTGGAAATCTACTAGTT		126
			R: CACGCCTAAACAATGCTGACG
